# Supplementary material for: Impact of Alcohol Dehydrogenase 7 Polymorphism and Alcohol Consumption on Risk of Head and Neck Squamous Cell Carcinoma: A Korean Case-Control Study
Source: MDPI journal article supplement (doi:10.3390/jcm12144653), 2023-07-13
Supplement: s1 [file s1]

**Table S2.** Logistic analysis of *ADH7* rs3737482T>C polymorphism in Korean head and neck squamous cell carcinoma patients and controls according to alcohol consumption.

| Alcohol                   | Genotype | Cancer      | Normal      | OR* (95% CI <sup>†</sup> ) | <i>P</i>     |
|---------------------------|----------|-------------|-------------|----------------------------|--------------|
| Non-drinker<br>(n=182)    | TT       | 26 (28.0 %) | 21 (23.6 %) | 1                          |              |
|                           | CT       | 44 (47.3 %) | 42 (47.2 %) | 0.59 (0.21–1.68)           | 0.322        |
|                           | CC       | 23 (24.7 %) | 26 (29.2 %) | 0.75 (0.23–2.42)           | 0.628        |
| Social drinker<br>(n=202) | TT       | 23 (43.4 %) | 38 (25.5 %) | 1                          |              |
|                           | CT       | 26 (49.1 %) | 82 (55.0 %) | 0.53 (0.22–1.27)           | 0.151        |
|                           | CC       | 4 (7.5 %)   | 29 (19.5 %) | <b>0.16 (0.04–0.69)</b>    | <b>0.014</b> |
| Heavy drinker<br>(n=188)  | TT       | 44 (42.3 %) | 22 (26.2 %) | 1                          |              |
|                           | CT       | 41 (39.4 %) | 45 (53.6 %) | <b>0.40 (0.17–0.92)</b>    | <b>0.032</b> |
|                           | CC       | 19 (18.3 %) | 17 (20.2 %) | 0.72 (0.25–2.10)           | 0.549        |

\* adjusted Odds ratio; †95% Confidence interval
