# Supplementary material for: Impact of Alcohol Dehydrogenase 7 Polymorphism and Alcohol Consumption on Risk of Head and Neck Squamous Cell Carcinoma: A Korean Case-Control Study
Source: MDPI journal article supplement (doi:10.3390/jcm12144653), 2023-07-13
Supplement: s1 [file s1]

**Table S1. Analysis of haplotypes of *ADH7* in Korean head and neck squamous cell carcinoma patients and controls.**

| Gene        | Loci | Geno<br>type | Distribution  |               | Referent analysis     |          | Codominant analysis |          | Dominant analysis   |          | Recessive analysis  |          |
|-------------|------|--------------|---------------|---------------|-----------------------|----------|---------------------|----------|---------------------|----------|---------------------|----------|
|             |      |              | Case          | Control       | OR*                   |          | OR                  |          | OR                  |          | OR                  |          |
|             |      |              | (%)           | (%)           | (95% CI) <sup>†</sup> | <i>p</i> | (95% CI)            | <i>p</i> | (95% CI)            | <i>p</i> | (95% CI)            | <i>P</i> |
| <i>ADH7</i> | ht3  | -/-          | 155<br>(62.0) | 216<br>(67.1) | 1                     |          |                     |          |                     |          |                     |          |
|             |      | ht3/-        | 85<br>(34.0)  | 96<br>(29.8)  | 1.22<br>(0.77-1.93)   | 0.40     | 1.12<br>(0.77-1.65) | 0.55     | 1.19<br>(0.76-1.86) | 0.45     | 0.91<br>(0.29-2.87) | 0.88     |
|             |      | ht3/ht3      | 10<br>(4.0)   | 10<br>(3.1)   | 0.99<br>(0.55-1.78)   | 0.97     |                     |          |                     |          |                     |          |

\* Adjusted odds ratio; <sup>†</sup>95% Confidence interval
