# Supplementary material for: Impact of Alcohol Dehydrogenase 7 Polymorphism and Alcohol Consumption on Risk of Head and Neck Squamous Cell Carcinoma: A Korean Case-Control Study
Source: MDPI journal article supplement (doi:10.3390/jcm12144653), 2023-07-13
Supplement: s1 [file s1]

**Table S3.** Logistic analysis of *ADH7* rs1154460G>A polymorphism in Korean head and neck squamous cell carcinoma patients and controls according to alcohol consumption.

| Alcohol                   | Genotype | Case (%)  | Control (%) | OR* (95% CI <sup>†</sup> ) | <i>P</i>     |
|---------------------------|----------|-----------|-------------|----------------------------|--------------|
| Non-drinker<br>(n=182)    | GG       | 43 (46.2) | 41 (46.1)   | 1                          |              |
|                           | AG       | 39 (41.9) | 39 (43.8)   | 0.80 (0.32–2.01)           | 0.631        |
|                           | AA       | 11 (11.8) | 9 (10.1)    | 1.25 (0.30–5.27)           | 0.760        |
| Social drinker<br>(n=202) | GG       | 13 (24.5) | 60 (40.3)   | 1                          |              |
|                           | AG       | 30 (56.6) | 75 (50.3)   | <b>2.60 (1.02–6.62)</b>    | <b>0.046</b> |
|                           | AA       | 10 (18.9) | 14 (9.4)    | <b>5.85 (1.58–21.62)</b>   | <b>0.008</b> |
| Heavy drinker<br>(n=188)  | GG       | 38 (36.5) | 35 (41.7)   | 1                          |              |
|                           | AG       | 51 (49.0) | 43 (51.2)   | 1.05 (0.48–2.32)           | 0.903        |
|                           | AA       | 15 (14.4) | 6 (7.1)     | 2.79 (0.77–10.13)          | 0.119        |

\* adjusted Odds ratio; †95% Confidence interval
